# Supplementary material for: Improvement of a multi-tubular Fischer–Tropsch reactor with gas recycle by appropriate combination of axial activity distribution and gas velocity
Source: Royal Society of Chemistry journal article supplement (doi:10.1039/d3cy00093a), 2023-01-01
Supplement: d3cy00093a1.pdf [file d3cy00093a1.pdf]

## Improvement of a multi-tubular Fischer-Tropsch reactor with gas recycle by appropriate combination of axial activity distribution and gas velocity

Christoph Kern, Andreas Jess\* (jess@uni-bayreuth.de)

### Supporting Information

#### Supplement to Chapter 3

##### Mass balances for CO, H<sub>2</sub>, and CH<sub>4</sub>

For a molar H<sub>2</sub>-to-CO ratio of 2.2 and a selectivity to CH<sub>4</sub> of 20%, which leads to an equal conversion of CO and H<sub>2</sub>, the mass balances for CO yield the following molar flow rates at the in- and outlet of the reactor and in the recycle and purge gas stream:

$$\dot{n}_{CO,reactor,in} = \dot{n}_{CO,fresh,SG} + \dot{n}_{CO,recycle} \quad (S1)$$

$$\dot{n}_{CO,reactor,out} = (1 - X_{CO,per\ pass}) (\dot{n}_{CO,fresh,SG} + \dot{n}_{CO,recycle}) \quad (S2)$$

$$\dot{n}_{CO,recycle} = \dot{n}_{CO,reactor,out} - \dot{n}_{CO,purge} \quad (S3)$$

$$\dot{n}_{CO,purge} = X_{CO,total} \dot{n}_{CO,fresh,SG} \quad (S4)$$

Combination of the equations (7), (S1), (S2), (S3), and (S4) yields all the different dimensionless molar rates of CO related to the given feed rate CO in the fresh syngas

$$\frac{\dot{n}_{CO,reactor,out}}{\dot{n}_{CO,fresh,SG}} = \frac{X_{CO,total} (1 - X_{CO,per\ pass})}{X_{CO,per\ pass}} \quad (S5)$$

$$\frac{\dot{n}_{CO,recycle}}{\dot{n}_{CO,fresh,SG}} = \frac{(X_{CO,total} - X_{CO,per\ pass})}{X_{CO,per\ pass}} \quad (S6)$$

$$\frac{\dot{n}_{CO,reactor,in}}{\dot{n}_{CO,fresh,SG}} = \frac{X_{CO,total}}{X_{CO,per\ pass}} \quad (S7)$$

$$\frac{\dot{n}_{CO,purge}}{\dot{n}_{CO,fresh,SG}} = X_{CO,total} \quad (S8)$$

The respective rates of H<sub>2</sub> are then simply by a factor of 2.2 higher:

$$\frac{\dot{n}_{H_2,i}}{\dot{n}_{CO,fresh,SG}} = \frac{2.2 \dot{n}_{CO,i}}{\dot{n}_{CO,fresh,SG}} \quad (\text{with } i = reactor,out, reactor,in, purge, \text{ or } recycle) \quad (S9)$$

Finally, the molar flow rates of methane are deduced in a similar manner:

$$\begin{aligned} \dot{n}_{CH_4,reactor,in} &= \dot{n}_{CH_4,recycle} \\ &= y_{CH_4,recycle} (\dot{n}_{CO,recycle} + \dot{n}_{H_2,recycle} + \dot{n}_{CH_4,recycle}) \\ &= y_{CH_4,recycle} (3.2 \dot{n}_{CO,recycle} + \dot{n}_{CH_4,recycle}) \end{aligned} \quad (S10)$$

$$\dot{n}_{CH_4,reactor,out} = \dot{n}_{CH_4,recycle} + \dot{n}_{CH_4,purge} \quad (S11)$$

Introduction of Eq. (9) in Eq. (S11) leads to

$$\dot{n}_{CH_4,reactor,out} = \dot{n}_{CH_4,recycle} + 0.2 X_{CO,per\ pass} \dot{n}_{CO,reactor,in} \quad (S12)$$

Combination of Eq. (S8), Eq. (S6), and Eq. (S8) (for the case of H<sub>2</sub> in the recycle stream) yields

$$\frac{\dot{n}_{CH_4,recycle}}{\dot{n}_{CO,fresh,SG}} = \frac{y_{CH_4,recycle}}{(1-y_{CH_4,recycle})} \left( \frac{3.2 (X_{CO,total} - X_{CO,per\ pass})}{X_{CO,per\ pass}} \right) \quad (S13)$$

Insertion of Eq. (10) into Eq. (S13) finally yields:

$$\frac{\dot{n}_{CH_4,recycle}}{\dot{n}_{CO,fresh,SG}} = \frac{\dot{n}_{CH_4,reactor,in}}{\dot{n}_{CO,fresh,SG}} = \frac{0.2 X_{CO,total}}{(1 - X_{CO,total})} \frac{(X_{CO,total} - X_{CO,per\ pass})}{X_{CO,per\ pass}} \quad (S14)$$

Readjustment of Eq. (9) leads to the dimensionless recycle stream of methane

$$\frac{\dot{n}_{CH_4,purge}}{\dot{n}_{CO,fresh,SG}} = 0.2 X_{CO,total} \quad (S15)$$

For the recycle ratio  $R$  (rate of recycle gas to fresh syngas) we then have:

$$R = \frac{\dot{n}_{recycle}}{\dot{n}_{fresh,SG}} = \frac{(3.2 \dot{n}_{CO,recycle} + \dot{n}_{CH_4,recycle})}{\dot{n}_{fresh,SG}} = \frac{(3.2 - 3 X_{CO,total}) (X_{CO,total} - X_{CO,per\ pass})}{(1 - X_{CO,total}) 3.2 X_{CO,per\ pass}} \quad (S16)$$

#### Supplement to Chapter 4.1

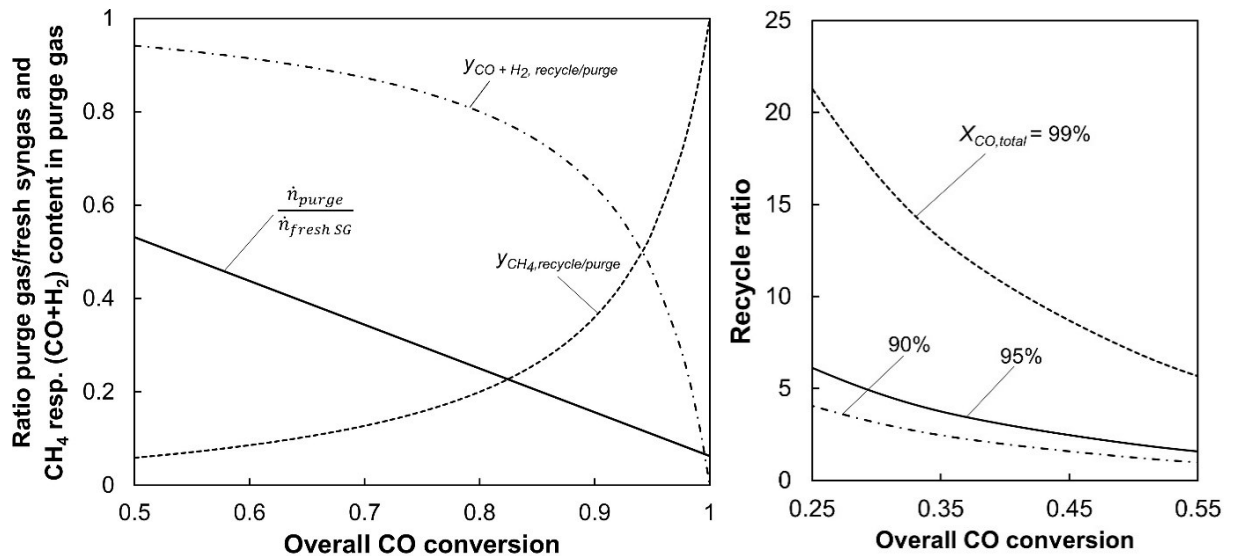

**Fig. S1:** Influence of overall CO conversion ( $X_{CO,total}$ ) on the ratio of purge gas stream to the stream of fresh syngas and on the CH<sub>4</sub> and combined CO/H<sub>2</sub> content in the recycle and purge gas of a FT reactor (left) and on the recycle ratio  $R$  (right) (CH<sub>4</sub> selectivity = 20%, H<sub>2</sub>-to-CO ratio = 2.2).

### Supplements to Chapter 4.3

**Tab. S1:** Characteristic data of a multi-tubular fixed bed FT reactor for a uniform activity but different superficial gas velocities  $u_s$  with and without gas recycle ( $C_a = 2$ ;  $X_{CO, total} = 95\%$ ;  $CH_4$  selectivity = 20%,  $H_2$ -to-CO ratio = 2.2;  $T_{max} = 240^\circ C$ ; 913, 1369, and 1825 mol/h syngas at reactor inlet for gas recycle and  $u_s = 0.5, 0.75$ , and 1 m/s).

| $u_s$                                                                                                                                      | $n_{SG, fresh}$<br>in mol/h | $T_{cool}$<br>in $^\circ C$ | $X_{CO, per\ pass}$<br>in % | $y_{CH_4, reactor, in}$<br>in % | $R$  | Prod. of $C_{2+}$ per single tube in kgC/h |
|--------------------------------------------------------------------------------------------------------------------------------------------|-----------------------------|-----------------------------|-----------------------------|---------------------------------|------|--------------------------------------------|
| 1                                                                                                                                          | 461                         | 223.8                       | 40.4                        | 40.7                            | 2.96 | 1.31                                       |
| 0.75                                                                                                                                       | 424                         | 221.2                       | 47.4                        | 37.1                            | 2.20 | 1.21                                       |
| 0.5                                                                                                                                        | 368                         | 216.6                       | 56.8                        | 31.9                            | 1.47 | 1.05                                       |
| <b>Only for comparison: cases without gas recycle (<math>R = 0</math>; syngas: 31.3% CO, 68.7% <math>H_2</math>, no <math>CH_4</math>)</b> |                             |                             |                             |                                 |      |                                            |
| $u_s$                                                                                                                                      | $n_{SG}$<br>in mol/h        | $T_{cool}$<br>in $^\circ C$ | $T_{max}$<br>in $^\circ C$  | $X_{CO}$<br>in %                | $R$  | Prod. of $C_{2+}$ per single tube in kgC/h |
| 1                                                                                                                                          | 1825                        | 218.2                       | 240                         | 33.0                            | 0    | 1.81                                       |
| 0.75                                                                                                                                       | 1369                        | 215.4                       | 239.3 <sup>a</sup>          | 38.8                            |      | 1.59                                       |
| 0.5                                                                                                                                        | 913                         | 209.5                       | 232.4 <sup>b</sup>          | 42.8                            |      | 1.17                                       |

<sup>a</sup>  $T_{ig} = 215.4^\circ C$ . <sup>b</sup>  $T_{ig} = 214.5^\circ C$ .

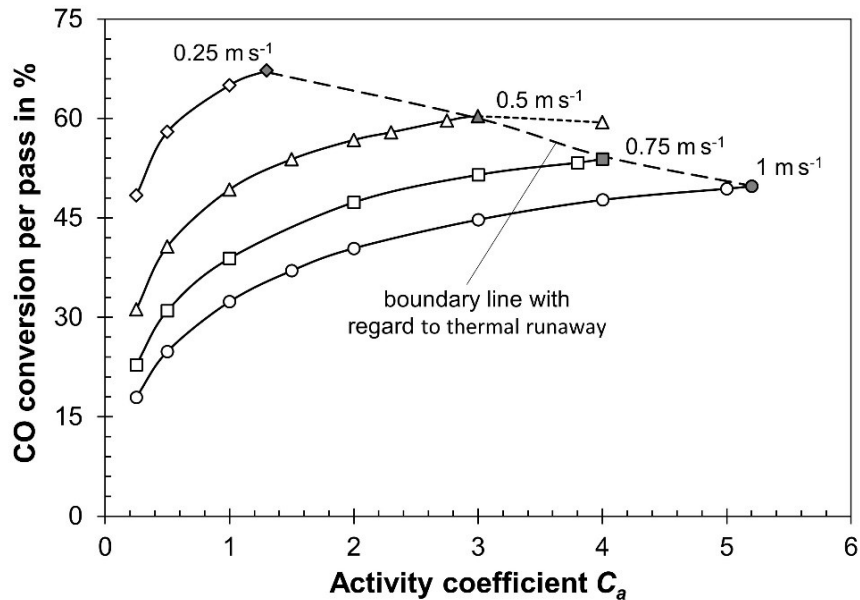

**Fig. S2:** Influence of activity coefficient  $C_a$  on the CO conversion per pass for different values of  $u_s$  ( $p_{total} = 30$  bar;  $X_{CO, total} = 95\%$ ;  $CH_4$  selectivity = 20%;  $H_2$ -to-CO ratio = 2.2;  $T_{max} = 240^\circ C$  except for 0.5 m/s and  $C_a = 4$  with  $T_{cool} = 208^\circ C$  and  $T_{max} = 235^\circ C$ ). Filled symbols: critical cases with regard to thermal runaway ( $T_{max} = 240^\circ C$ ).

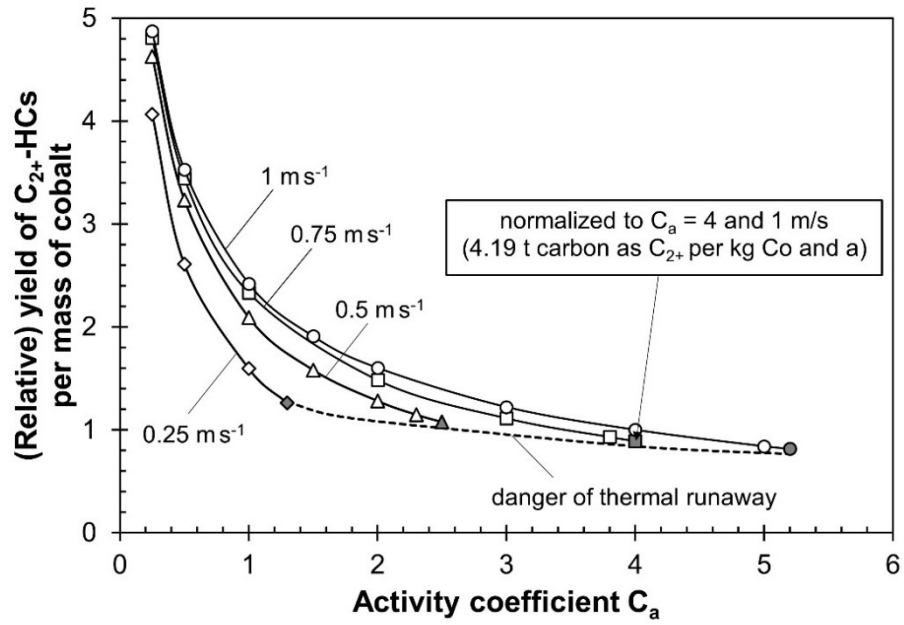

**Fig. S3:** Influence of the activity coefficient  $C_a$  on the (relative) yield of  $C_{2+}$ -HCs per mass of cobalt at different superficial gas velocities  $u_s$  ( $p_{total} = 30 \text{ bar}$ ;  $X_{CO, total} = 95\%$ ;  $CH_4$  selectivity = 20%;  $H_2$ -to-CO ratio = 2.2;  $T_{max} = 240^\circ\text{C}$ ). Filled symbols represent critical cases with regard to thermal runaway.

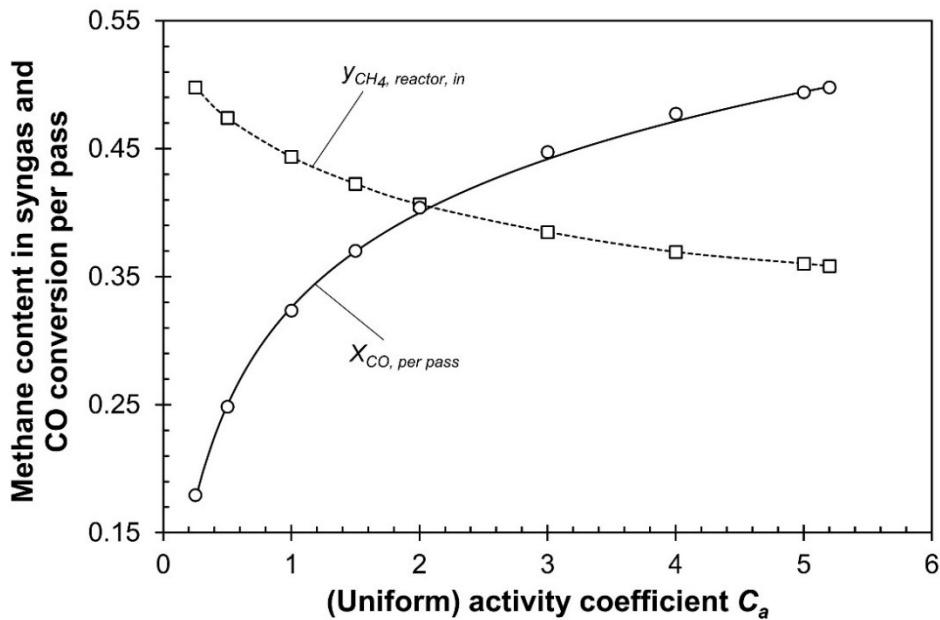

**Fig. S4:** Influence of (uniform) axial activity  $C_a$  on methane content in syngas entering the FT reactor and on the CO conversion per pass ( $p_{total} = 30 \text{ bar}$ ;  $u_s = 1 \text{ m/s}$ ;  $X_{CO, total} = 95\%$ ;  $CH_4$  selectivity = 20%;  $H_2$ -to-CO ratio = 2.2;  $T_{max} = 240^\circ\text{C}$ ).

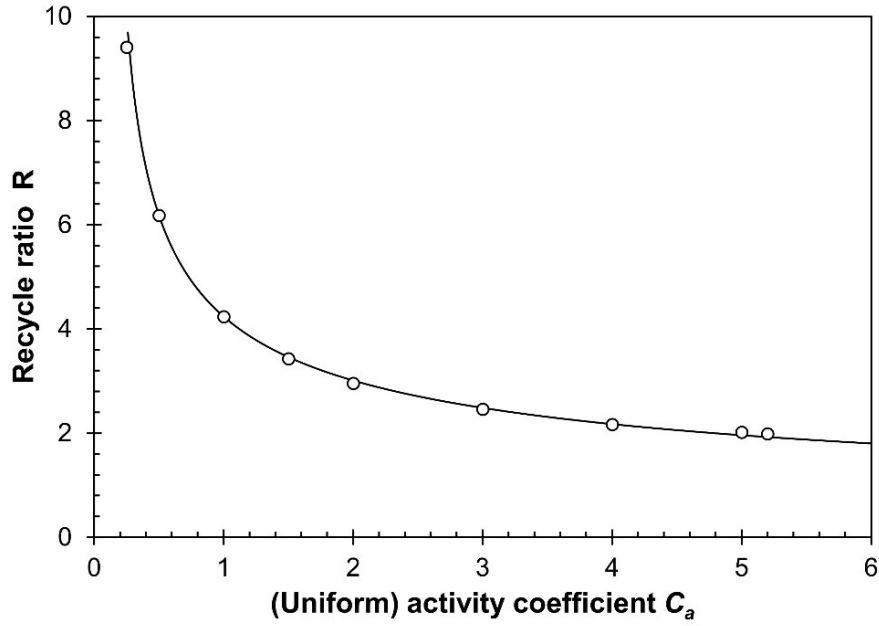

**Fig. S5:** Influence of (uniform) axial activity  $C_a$  on recycle ratio of FT reactor ( $p_{total} = 30$  bar;  $u_s = 1$  m/s;  $X_{CO,total} = 95\%$ ;  $CH_4$  selectivity = 20%;  $H_2$ -to-CO ratio = 2.2;  $T_{max} = 240^\circ C$ ).

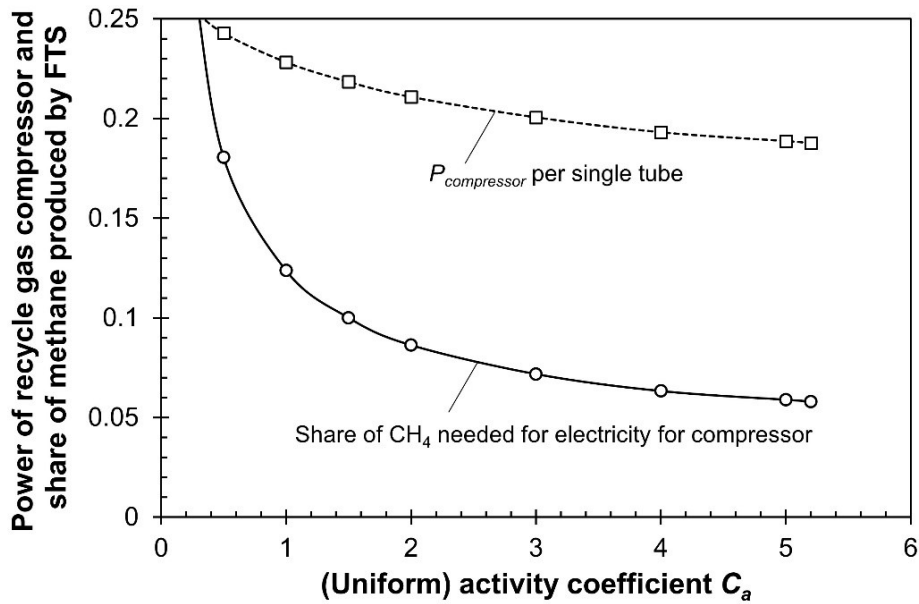

**Fig. S6:** Influence of (uniform) axial activity  $C_a$  on the power of the recycle gas compressor and on the share of methane produced by FTS needed to drive the compressor (as a simple measure for the electrical energy need for gas recycling assuming an efficiency of power production of 40%) ( $p_{total} = 30$  bar;  $\Delta p = 6$  bar;  $u_s = 1$  m/s;  $X_{CO,total} = 95\%$ ;  $CH_4$  selectivity = 20%;  $H_2$ -to-CO ratio = 2.2;  $T_{max} = 240^\circ C$ ).

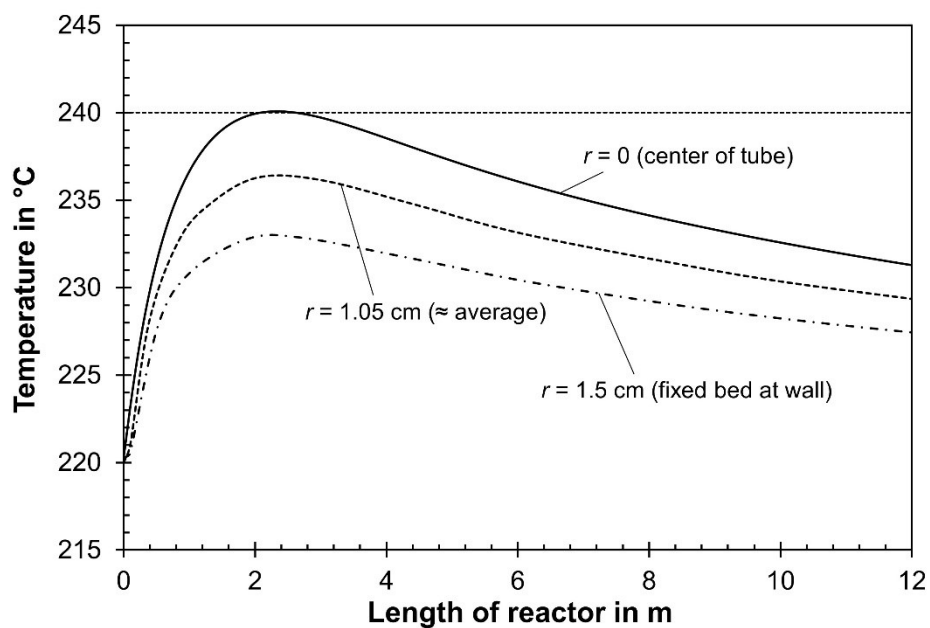

**Fig. S7:** Axial temperature profiles in the center of the single tube ( $r = 0$ ), at the position  $r = 1.05$  cm, and in the fixed bed directly at the wall ( $r = 1.5$  cm) ( $C_a = 3$ ;  $p_{total} = 30$  bar;  $u_s = 1$  m/s;  $X_{CO,total} = 95\%$ ;  $CH_4$  selectivity = 20%;  $H_2$ -to-CO ratio = 2.2;  $T_{max} = 240^\circ C$ ).

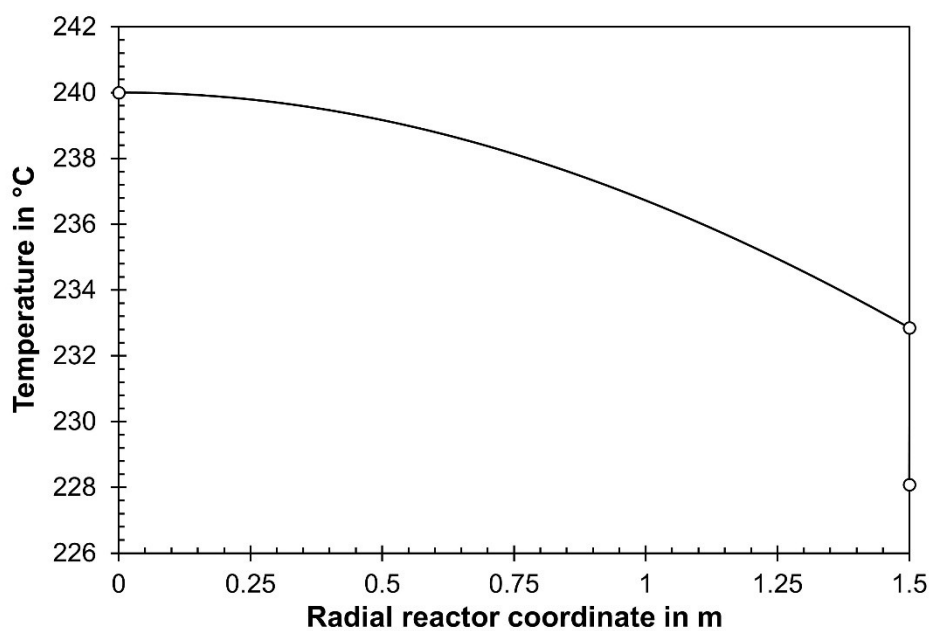

**Fig. S8:** Radial temperature profile at the position of the axial temperature maximum ( $z = 2.2$  m) ( $C_a = 3$ ;  $p_{total} = 30$  bar;  $u_s = 1$  m/s;  $X_{CO,total} = 95\%$ ;  $CH_4$  selectivity = 20%;  $H_2$ -to-CO ratio = 2.2;  $T_{max} = 240^\circ C$ ).

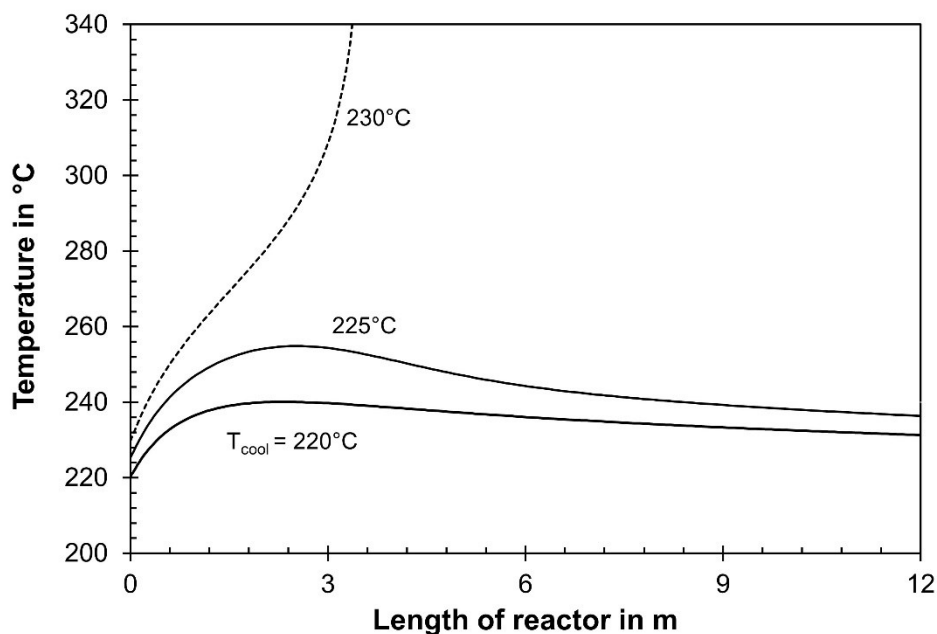

**Fig. S9:** Axial temperature profiles in the center of the single tube ( $r = 0$ ) for three different cooling temperatures. For  $T_{cool} = 230^{\circ}\text{C}$  (dashed-dotted line), thermal runaway occurs ( $C_a = 3$ ;  $p_{total} = 30$  bar;  $u_s = 1$  m/s;  $X_{CO,total} = 95\%$ ;  $\text{CH}_4$  selectivity = 20%;  $\text{H}_2$ -to-CO ratio = 2.2;  $T_{max} = 240^{\circ}\text{C}$ ).

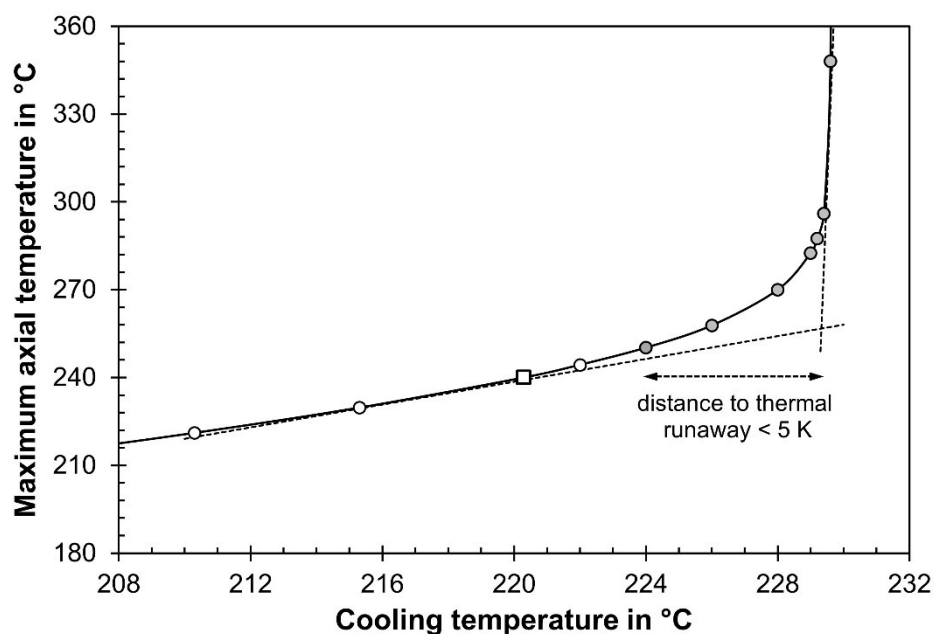

**Fig. S10:** Influence of  $T_{cool}$  on  $T_{max}$  (center of tube) at axial position of around  $z = 2$  m, where maximum axial temperature is reached (see Fig. S9). Thermal runaway occurs for  $T_{cool}$  of about  $230^{\circ}\text{C}$ ; hence,  $T_{cool}$  should be  $225^{\circ}\text{C}$  ( $C_a = 3$ ;  $p_{total} = 30$  bar;  $u_s = 1$  m/s;  $X_{CO,total} = 95\%$ ;  $\text{CH}_4$  selectivity = 20%; molar  $\text{H}_2$ -to-CO ratio = 2.2;  $T_{max} = 240^{\circ}\text{C}$ ).

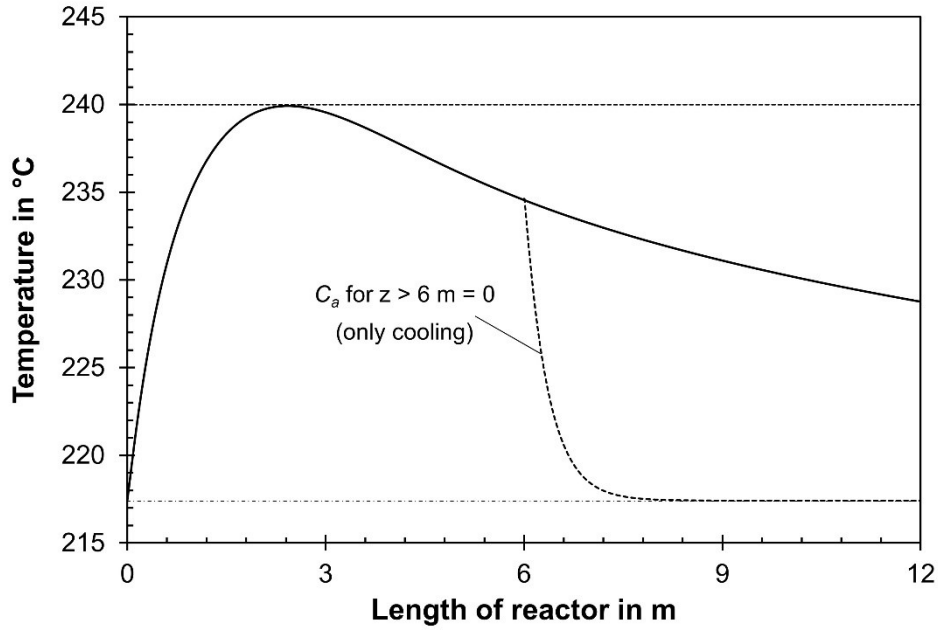

**Fig. S11:** Axial temperature profile in a single tube of a FT reactor with constant catalytic activity ( $C_a = 4$ ). The dotted line indicates the T-profile for the hypothetical case of no activity in the second part of the tube ( $C_a = 4$  for  $z < 6$  m) to show the high intensity of cooling in a multi-tubular FT-reactor ( $p_{total} = 30$  bar;  $u_s = 1$ ).

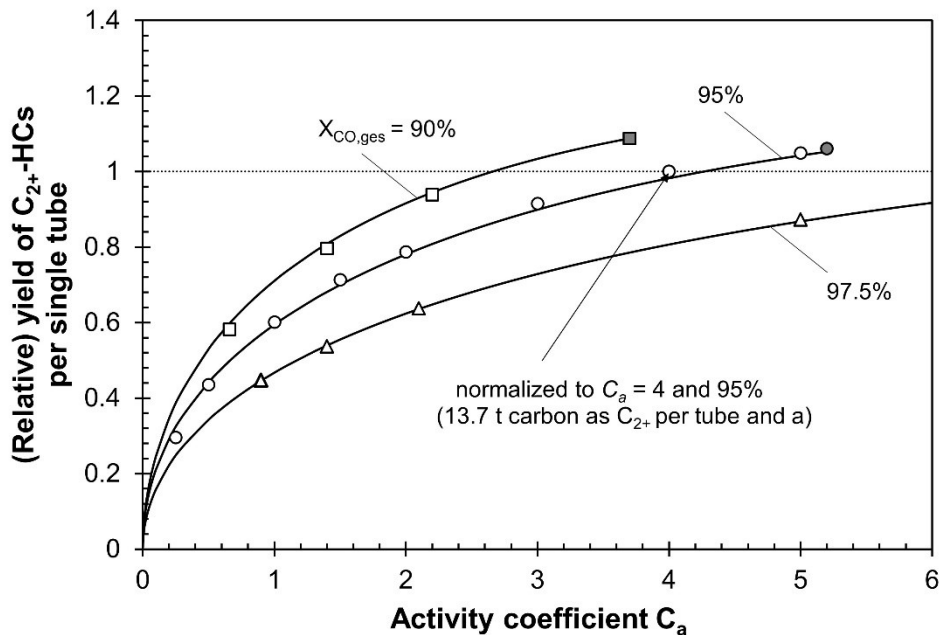

**Fig. S12:** Influence of activity coefficient  $C_a$  on the (relative) yield of  $C_{2+}$ -HCs per single tube for three different values of the overall CO conversion  $X_{CO,total}$ . A relative yield of one equals 13.7 t of carbon as  $C_{2+}$ -HCs per tube and year, reached for a uniform activity  $C_a$  of 4 ( $p_{total} = 30$  bar;  $u_s = 1$  m/s;  $CH_4$  selectivity = 20%;  $H_2$ -to-CO ratio = 2.2;  $T_{max} = 240^\circ C$ ). Filled symbols represent critical cases with regard to thermal runaway.

**Tab. S2:** Characteristic data of a cooled multi-tubular FT reactor for different uniform axial activities  $C_a$  and an overall CO conversion ( $X_{CO,total}$ ) of 90% and 97.5% ( $p_{total} = 30$  bar;  $u_s = 1$  m/s;  $CH_4$  selectivity = 20%,  $H_2$ -to-CO ratio = 2.2;  $T_{max} = 240^\circ C$ ;  $u_s = 1$  m/s; 1825 mol/h syngas at reactor inlet).

| $C_a$                                     | $n_{SG,fresh}$<br>in mol/h | $T_{cool}$<br>in $^\circ C$ | $X_{CO,per\ pass}$<br>in % | $y_{CH_4,reactor,\ in}$<br>in % | $R$  | Production of $C_{2+}$ per<br>single tube in $kg_C$ per h | $n_{purge}$<br>in mol/h |
|-------------------------------------------|----------------------------|-----------------------------|----------------------------|---------------------------------|------|-----------------------------------------------------------|-------------------------|
| <b><math>X_{CO,total} = 90\%</math></b>   |                            |                             |                            |                                 |      |                                                           |                         |
| 0.66                                      | 360                        | 229.2                       | 25.24                      | 28.9                            | 4.06 | 0.95                                                      | 71                      |
| 1.4                                       | 494                        | 224.2                       | 33.2                       | 33.2                            | 2.70 | 1.31                                                      | 105                     |
| 2.2                                       | 581                        | 220.5                       | 38.1                       | 38.1                            | 2.14 | 1.54                                                      | 134                     |
| 3.7 <sup>a</sup>                          | 674                        | 215.4                       | 43.21                      | 43.2                            | 1.71 | 1.79                                                      | 167                     |
| <b><math>X_{CO,total} = 97.5\%</math></b> |                            |                             |                            |                                 |      |                                                           |                         |
| 0.9                                       | 256                        | 231.4                       | 34.71                      | 61.0                            | 6.14 | 0.74                                                      | 25                      |
| 1.4                                       | 308                        | 229.2                       | 40.3                       | 59.0                            | 4.94 | 0.89                                                      | 32                      |
| 2.1                                       | 364                        | 227.7                       | 45.2                       | 56.8                            | 4.01 | 1.04                                                      | 39                      |
| 5                                         | 499                        | 220.7                       | 54.8                       | 51.5                            | 2.66 | 1.43                                                      | 59                      |
| 8.3 <sup>b</sup>                          | 580                        | 213.3                       | 59.2                       | 48.4                            | 2.15 | 1.66                                                      | 73                      |

<sup>a</sup> Limit  $C_a$  value with regard to runaway:  $T_{ig} = 220.3^\circ C$ , i.e.  $T_{cool,max} = T_{ig} - 5\ K = 215.3^\circ C$ .

<sup>b</sup> Such a high value of  $C_a$  is unrealistic for a real FT-catalyst.

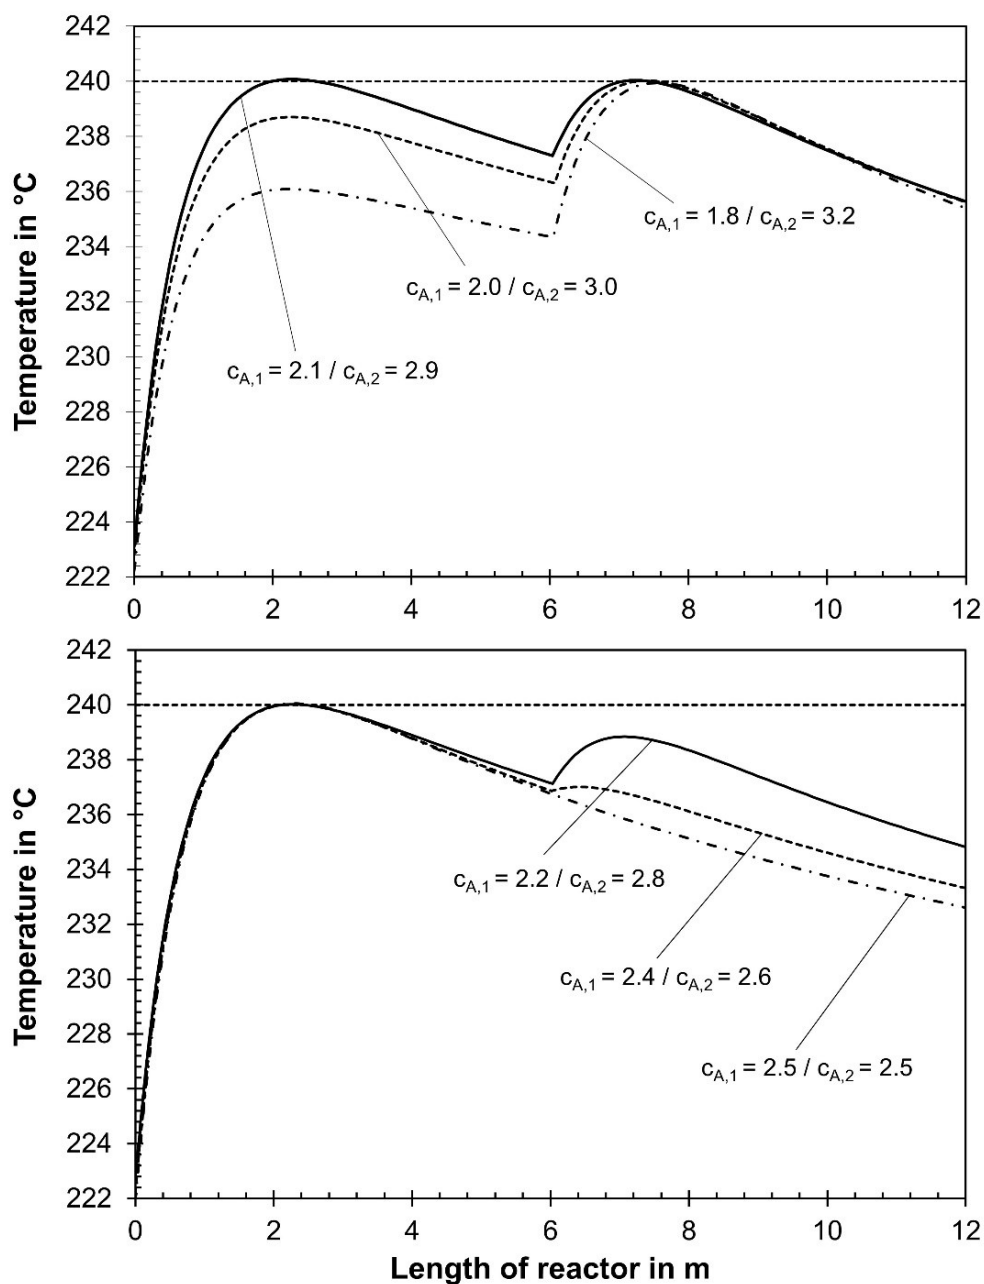

**Fig. S13:** Axial temperature profiles in a two-zone FT reactor with two catalytic zones of equal length (6 m) for different values of the activities  $C_{a,1}$  and  $C_{a,2}$  and a constant mean activity  $C_{a,mean}$  of 2.5. The corresponding values of the yield of  $C_{2+}$ -HCs are shown in Fig. S11 ( $p_{total} = 30$  bar;  $u_s = 1$  m/s;  $CH_4$  selectivity = 20%;  $H_2$ -to-CO ratio = 2.2;  $T_{max} = 240^\circ C$ ).

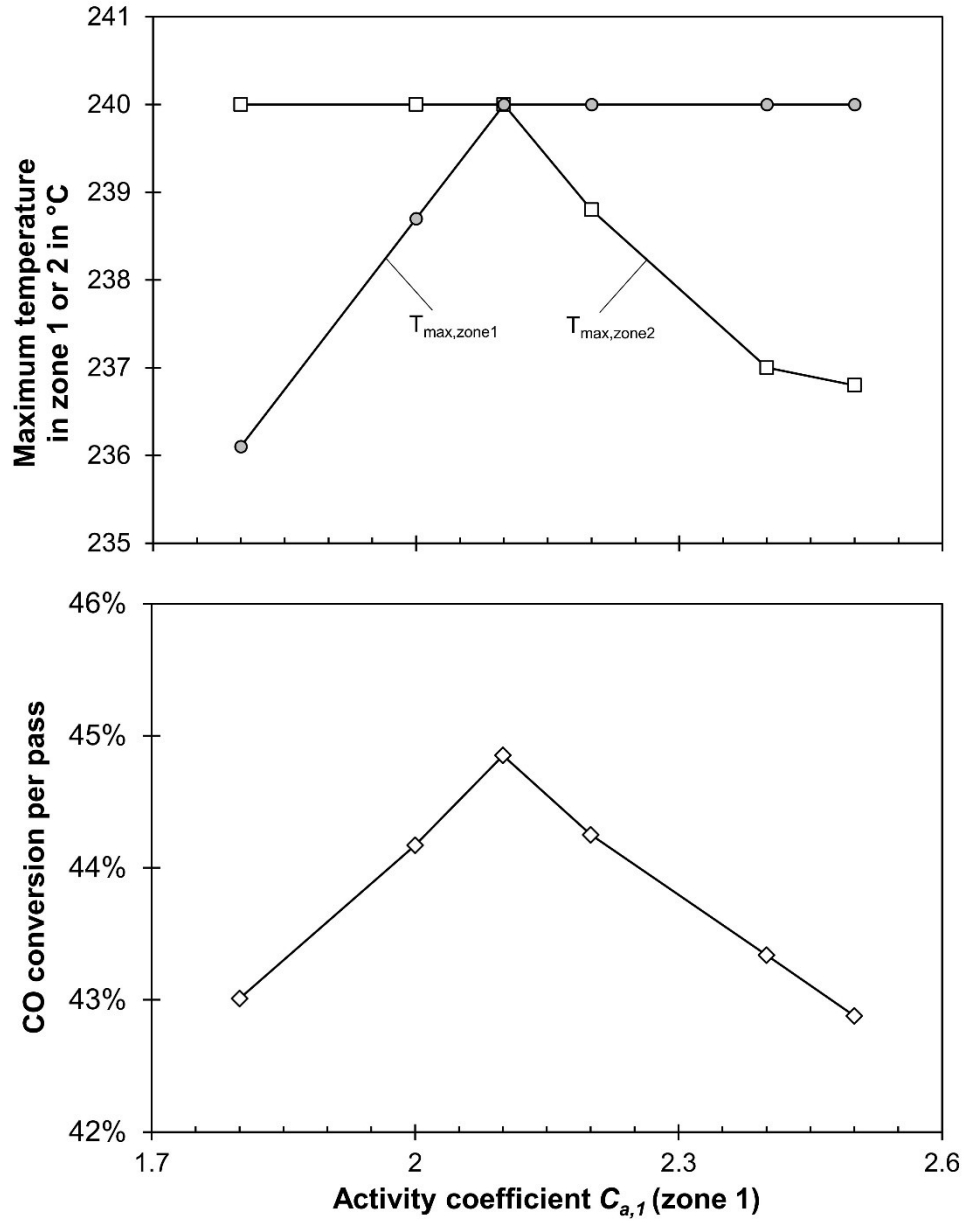

**Fig. S14:** Maximum axial temperatures in both zones of a two-zone FT reactor (top) and CO-conversion per pass (bottom) for a variation of  $C_{a,1}$  and a constant value of  $C_{a,mean}$  of 2.5, i.e.  $C_{a,2} = 5 - C_{a,1}$  ( $p_{total} = 30$  bar;  $u_s = 1$  m/s;  $\text{CH}_4$  selectivity = 20%;  $\text{H}_2$ -to-CO ratio = 2.2).

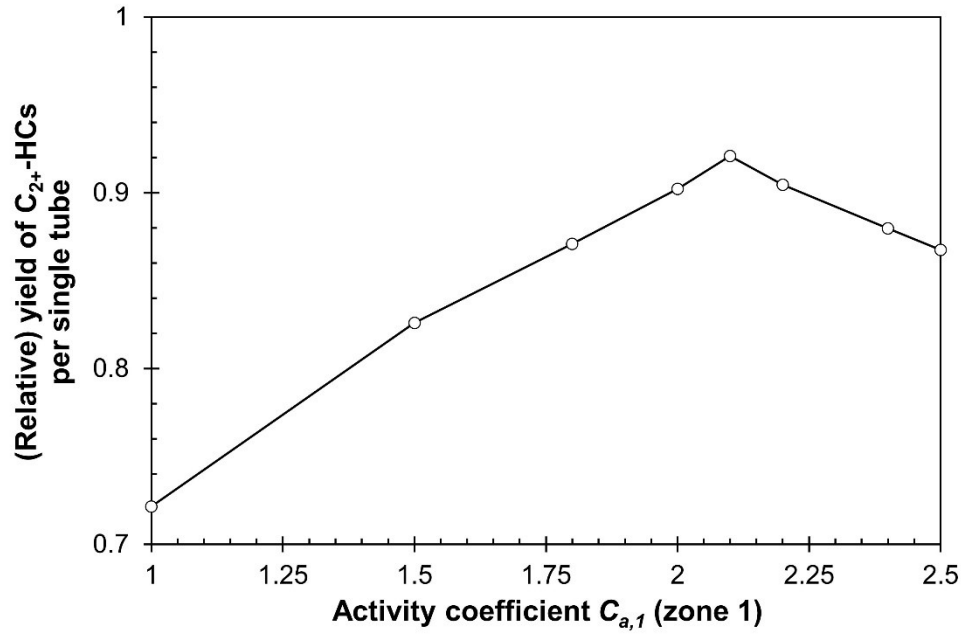

**Fig. S15:** FT reactor with two zones of equal length (6 m): Influence of  $C_{a,1}$  on (relative) yield of  $C_{2+}$ -HCs per tube ( $C_{a,mean} = 2.5$ ;  $C_{a,2} = 2 C_{a,mean} - C_{a,1}$ ; conditions in Fig. S10). A relative yield of one equals 13.7 t of carbon as  $C_{2+}$ -HCs per tube and a, reached for a uniform activity  $C_a$  of 4. Maximum yield is reached for  $C_{a,1} = 2.1$  and  $C_{a,2} = 2.9$ , corresponding to case that  $T_{max} = 240^\circ\text{C}$  in both zones (see Fig. S10).

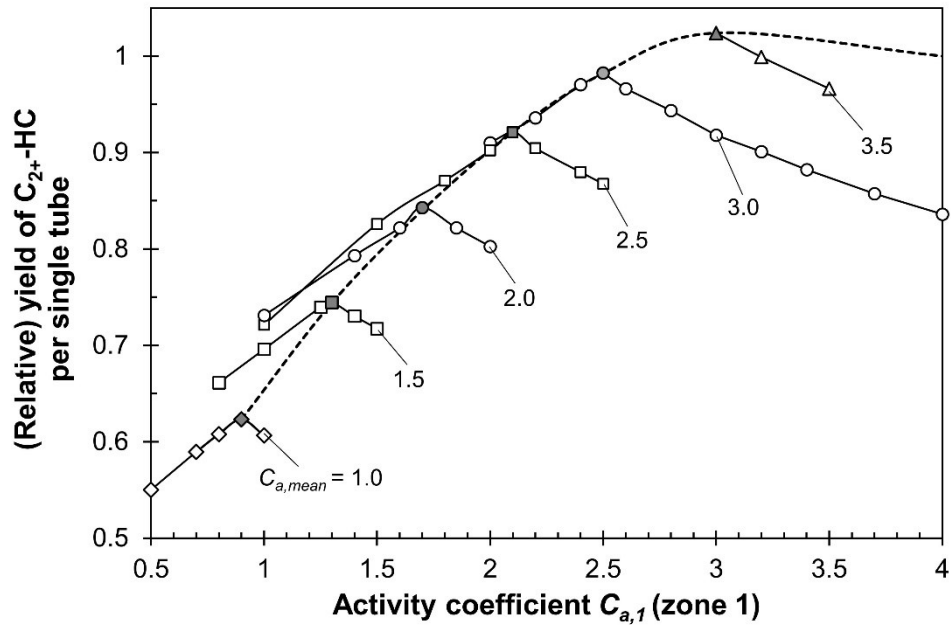

**Fig. S16:** Two-zone reactor (tube) with two fixed beds of equal length (6 m): Influence of activity coefficient  $C_{a,1}$  on relative yield of  $C_{2+}$ -HC per tube for different mean activities  $C_{a,mean}$ . A relative yield of one corresponds to 13.7 t of carbon as  $C_{2+}$ -HCs per tube and a, reached for a uniform activity  $C_a$  of 4. Filled symbols represent maximum yield reached in each case. Dotted line connects optimum values of for each  $C_{a,1}$  (30 bar;  $u_{s,z=0} = 1$  m/s;  $\text{CH}_4$  selectivity = 20%; molar  $\text{H}_2$ -to-CO ratio = 2.2;  $T_{max} = 240^\circ\text{C}$ ).

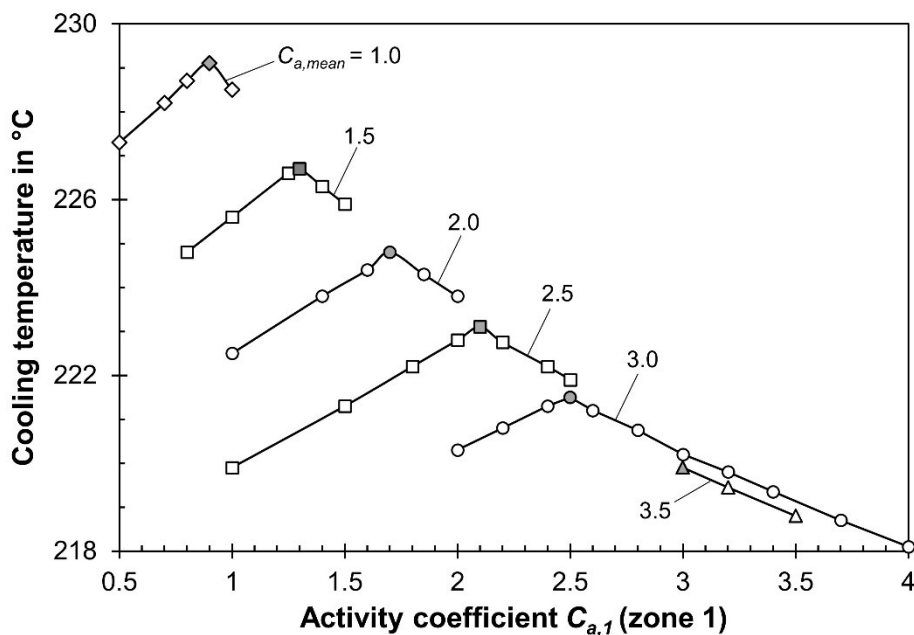

**Fig. S17:** Two-zone FT reactor with zones of equal length (6 m): Influence of activity coefficient  $C_{a,1}$  on  $T_{cool}$  for different mean activities  $C_{a,mean}$ . Filled symbols represent case that maximum yield is reached, see also Fig. S16 ( $p_{total} = 30$  bar;  $u_s = 1$  m/s;  $\text{CH}_4$  selectivity = 20%;  $\text{H}_2$ -to-CO ratio = 2.2;  $T_{max} = 240^\circ\text{C}$ ).

#### Supplements to Chapter 4.5

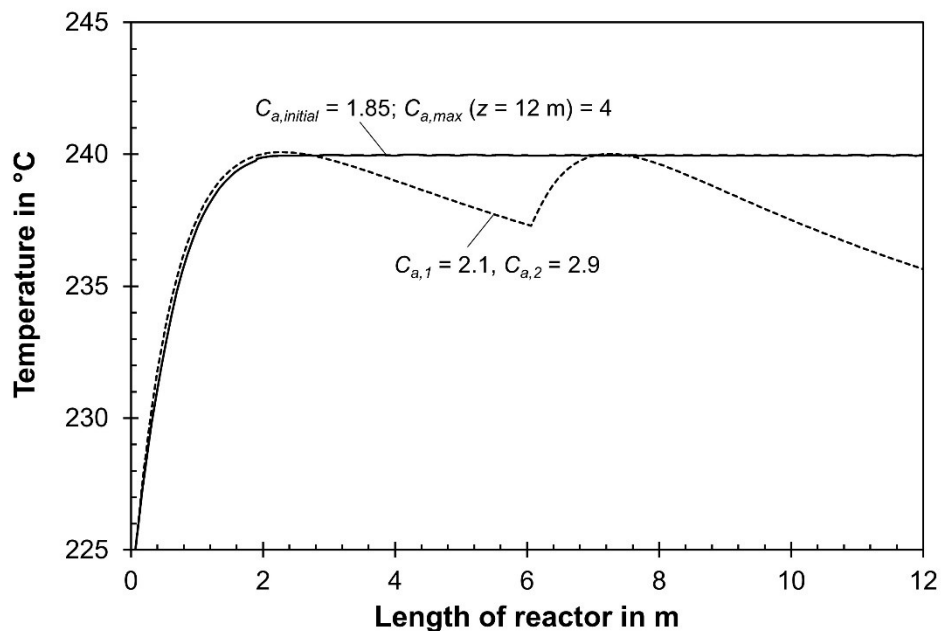

**Fig. S18:** Axial temperature profiles at  $r = 0$  (center of tube) in a single tube of a FT reactor for two zones of equal length (6 m) with  $C_{a,1} = 2.1$  and  $C_{a,2} = 2.9$  (dashed line) and for a reactor with  $C_{a,initial} = 1.85$  until  $T_{max}$  of  $240^\circ\text{C}$  is reached (at  $z = 2.45$  m) and thereafter a continuous increase of  $C_a$  to keep the temperature ( $240^\circ\text{C}$  at  $r = 0$ ) constant ( $p_{total} = 30$  bar;  $X_{\text{CO},total} = 95\%$ ;  $\text{CH}_4$  selectivity = 20%,  $\text{H}_2$ -to-CO ratio = 2.2;  $T_{max} = 240^\circ\text{C}$ ;  $u_s, z = 0 = 1$  m/s). Further data in Tab. S3.

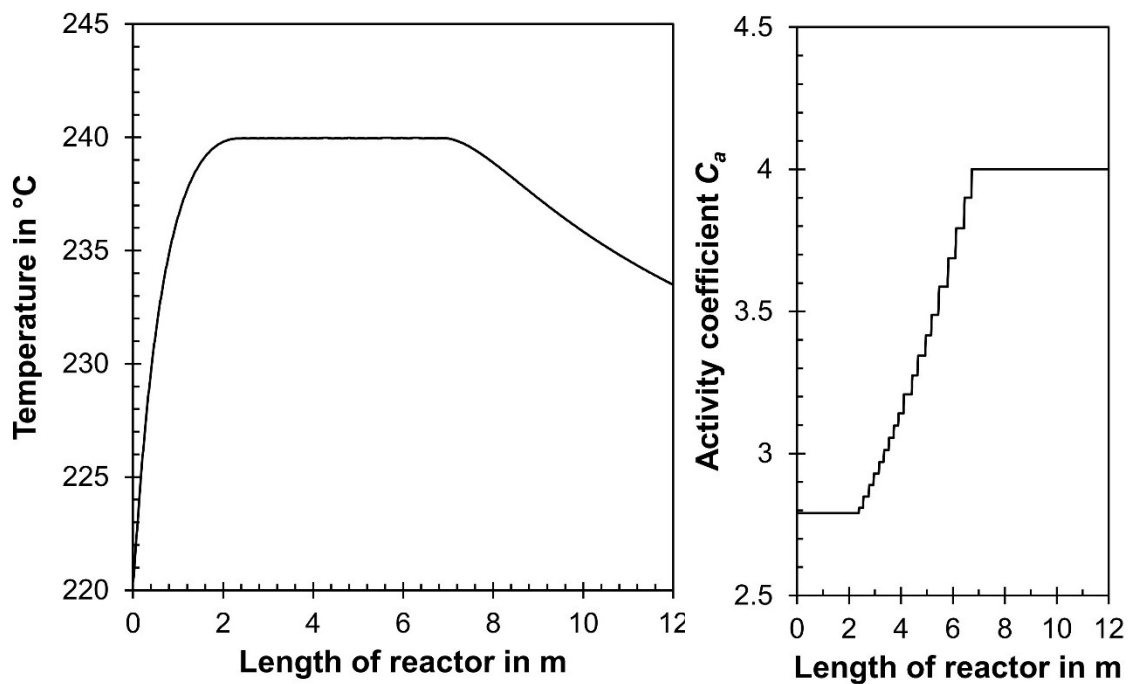

**Fig. S19:** T-profiles ( $r = 0$ ) and grading of activity in a single tube for  $C_{a,initial} = 2.79$  until 240°C is reached ( $z = 2.5$  m) and then a rise of  $C_a$  to keep the temperature (240°C at  $r = 0$ ) constant until  $C_{a,max}$  of 4 is reached at  $z = 6$  m (30 bar;  $X_{CO,total} = 95\%$ ;  $CH_4$  selectivity = 20%,  $H_2$ -to-CO ratio = 2.2;  $T_{max} = 240^\circ C$ ;  $u_{s, z=0} = 1$  m/s; further data in Tab. S3).

**Tab. S3:** Data of reactor for two activity distribution:  $C_{a,initial}$  until 240°C is reached and then rise of  $C_a$  to keep  $T$  at 240°C ( $r = 0$ ); two-zone reactor for optimal  $C_a$  values ( $X_{CO,total} = 95\%$ ;  $CH_4$  selectivity = 20%,  $H_2$ -to-CO ratio = 2.2;  $T_{max} = 240^\circ C$ ;  $u_{s,z=0} = 1$  m/s).

| $C_{a,mean}$     | $C_{a,1}$ ( $z < 6$ m); $C_{a,2}$ ( $6 \text{ m} < z < 12$ m)                                                     |                    | $X_{CO, per pass}$<br>in % | $T_{cool}$<br>in °C | $R$  | Production rate of<br>$C_{2+}$ -HCs per tube<br>in kg <sub>C</sub> per h                                              |
|------------------|-------------------------------------------------------------------------------------------------------------------|--------------------|----------------------------|---------------------|------|-----------------------------------------------------------------------------------------------------------------------|
|                  | $C_{a,1}$                                                                                                         | $C_{a,2}$          |                            |                     |      |                                                                                                                       |
| 1.5              | 1.3                                                                                                               | 1.7                | 38.1                       | 226.7               | 3.27 | 1.22                                                                                                                  |
| 2                | 1.7                                                                                                               | 2.3                | 41.8                       | 224.7               | 2.77 | 1.38                                                                                                                  |
| 2.5              | 2.1                                                                                                               | 2.9                | 44.9                       | 223.1               | 2.45 | 1.51                                                                                                                  |
| 3                | 2.5                                                                                                               | 3.5                | 47.0                       | 221.5               | 2.23 | 1.61                                                                                                                  |
| 3.5              | 3.0                                                                                                               | 4.0                | 48.5                       | 219.9               | 2.10 | 1.68                                                                                                                  |
| $C_{a,mean}$     | Optimal $C_a$ distribution<br>$C_{a,initial}$ and rise of $C_a$ , if $T_{max}$ is<br>reached ( $z \approx 2.5$ m) |                    | $X_{CO, per pass}$<br>in % | $T_{cool}$<br>in °C | $R$  | Production rate of<br>$C_{2+}$ -HCs per tube<br>in kg <sub>C</sub> per h<br>(improvement rel. to<br>two-zone reactor) |
|                  | $C_{a,initial}$                                                                                                   | $C_{a,max}$        |                            |                     |      |                                                                                                                       |
| 1.5              | 1.18                                                                                                              | 2.11 ( $z = 12$ m) | 38.9                       | 227.3               | 3.16 | 1.25 (+2.6%)                                                                                                          |
| 2                | 1.54                                                                                                              | 3.03 ( $z = 12$ m) | 43.0                       | 225.4               | 2.65 | 1.43 (+3.3%)                                                                                                          |
| 2.5              | 1.85                                                                                                              | 3.93 ( $z = 12$ m) | 46.1                       | 223.9               | 2.33 | 1.57 (+3.6%)                                                                                                          |
| 3 <sup>a</sup>   | 2.23                                                                                                              | 4 ( $z > 9.6$ m)   | 48.7                       | 222.3               | 2.08 | 1.70 (+5.0%)                                                                                                          |
| 3.5 <sup>a</sup> | 2.79                                                                                                              | 4 ( $z > 6.7$ m)   | 49.8                       | 220.4               | 1.98 | 1.75 (+3.9%)                                                                                                          |

<sup>a</sup> In these two cases, the limiting value of  $C_{a,max} = 4$  (catalyst with about 40 wt.-% Co) is reached at  $z = 9.6$  m and 6.8 m, respectively. Hence,  $T$  decreases thereafter and reaches 237°C and 234°C at  $z = 12$  m.
